# Supplementary material
Source: publisher site journal article supplement (https://www.dovepress.com/article/416422)
Supplement: Supplementary file 1 [file get_supplementary_file.php]

**Supplementary Table 1.** Keywords used for the search strategy.

| No | Population                                          |            | Index test                                                                                                   |            |                                          |            | Target condition                                                  |            |
|----|-----------------------------------------------------|------------|--------------------------------------------------------------------------------------------------------------|------------|------------------------------------------|------------|-------------------------------------------------------------------|------------|
|    | Diabetes Mellitus type I and type II                |            | Low cost smartphone-attached device for fundus photography                                                   |            |                                          |            | Table-top color fundus photography                                |            |
|    | population                                          | Source     | smartphone                                                                                                   | Source     | fundus photography                       | Source     | DR                                                                | Source     |
| 1  | Diabetes Mellitus                                   | MeSH       | Smartphone                                                                                                   | MeSH       | ophthalmoscope                           | MeSH       | Diabetic Retinopathy                                              | MeSH       |
| 2  | Diabetes Mellitus                                   | ti, ab     |                                                                                                              |            | ophthalmoscopy                           | MeSH       | Vision, low                                                       | MeSH       |
| 3  | diabet*                                             | ti, ab     | phone, cell                                                                                                  | MeSH       | fundus photograph*                       | all fields | blindness                                                         | MeSH       |
| 4  | non insulin depend* OR noninsulin depend*           | all fields | cellphone*                                                                                                   | ti,ab,kw.  | funduscop*                               | all fields | eye hemorrhage                                                    | MeSH       |
| 5  | insulin depend*                                     | all fields |                                                                                                              |            | fundus camera*                           | all fields | neovascularization, pathologic                                    | MeSH       |
| 6  | IDDM OR NIDDM OR MODY OR T1DM OR T2DM OR T1D OR T2D | all fields | ((cell* OR mobile* OR handheld* OR hand held* OR smart) AND (phone* OR telephone* OR technolog* OR device*)) | ti,ab,kw.  | Monocular indirect ophthalmoscop*        | all fields | Macular edema                                                     | MeSH       |
| 7  |                                                     |            | smartphone*                                                                                                  | ti,ab,kw.  | indirect ophthalmoscop*                  | all fields | vitreous body                                                     | MeSH       |
| 8  |                                                     |            |                                                                                                              |            | indirect lens adapter*                   | all fields | Diabetic Retinopath*                                              | all fields |
| 9  |                                                     |            | samsung OR nokia OR android                                                                                  | all fields | retinal imaging adapter*                 | all fields | diabet* AND retinopath*                                           | all fields |
| 10 |                                                     |            |                                                                                                              |            | ((retina*) OR (fundus)) AND ((photo*) OR | all fields | (vision* OR visual OR retina* OR eye) AND (disease* OR disorder*) | all fields |

|    |  |  |                                                           |            |                                                     |            |                                                                                                                                             |            |
|----|--|--|-----------------------------------------------------------|------------|-----------------------------------------------------|------------|---------------------------------------------------------------------------------------------------------------------------------------------|------------|
|    |  |  |                                                           |            | (imag*) OR (camera*)                                |            |                                                                                                                                             |            |
| 11 |  |  | ipad* OR i-pad* OR ipod* OR i-pod* OR iphone* OR i-phone* | all fields | (diagnos*) AND ((computer-assist*) OR (ophthalmo*)) | all fields | ((vision* OR visual*) AND (loss* OR subnormal OR low OR handicap OR impair* OR disab*))                                                     | all fields |
| 12 |  |  | Mobile technolog*                                         | all fields | tele-ophthalmolog*                                  | all fields | maculopath* OR blindness                                                                                                                    | all fields |
| 13 |  |  | Portable device*                                          | all fields |                                                     |            | retinopath*                                                                                                                                 | all fields |
| 14 |  |  | portable electronic device*                               | all fields | Photograph*                                         | all fields | ((hard OR soft) AND exudate*)                                                                                                               | all fields |
| 15 |  |  | Transportable Cellular Phone*                             | all fields | image*                                              | all fields | retina* microaneurysm*                                                                                                                      | all fields |
| 16 |  |  |                                                           |            |                                                     |            | (cotton wool AND (spot* OR patch*))                                                                                                         | all fields |
| 17 |  |  |                                                           |            |                                                     |            | (macula* AND (defect* OR degeneration* OR oedem* OR edem*))                                                                                 | all fields |
| 18 |  |  |                                                           |            |                                                     |            | (DME OR DMO OR CME OR CSME)                                                                                                                 | all fields |
| 19 |  |  |                                                           |            |                                                     |            | intraretina* microvascular abnormalit* OR IRMA                                                                                              | all fields |
| 20 |  |  |                                                           |            |                                                     |            | (venous AND (bead* OR loop*))                                                                                                               | all fields |
| 21 |  |  |                                                           |            |                                                     |            | ((vitre* OR intraretina*) AND (hemorrhag* OR haemorrhag*))                                                                                  | all fields |
| 22 |  |  |                                                           |            |                                                     |            | vitre* AND (body OR bodies)                                                                                                                 | all fields |
| 23 |  |  |                                                           |            |                                                     |            |                                                                                                                                             |            |
| 24 |  |  |                                                           |            |                                                     |            |                                                                                                                                             |            |
| 25 |  |  |                                                           |            |                                                     |            | (retin* AND (detachment* OR neovascularization* OR neovascularisation* OR proliferans OR pre-proliferat* OR preproliferat* OR proliferat*)) | all fields |

|    |  |  |  |  |  |  |                                                                                                   |            |
|----|--|--|--|--|--|--|---------------------------------------------------------------------------------------------------|------------|
| 26 |  |  |  |  |  |  | fibrous tissue OR retinitis OR maculopath*                                                        | all fields |
|    |  |  |  |  |  |  | (rubeosis AND (iris* OR irid*))                                                                   | all fields |
|    |  |  |  |  |  |  | VTDR OR STDR OR vision-threatening diabetic retinopath* OR sight-threatening diabetic retinopath* | all fields |



**Supplementary Table 3.** Search strategy for CENTRAL in April 22<sup>nd</sup> 2021.

| ID  | Search                                                                                                                                                                                                         |
|-----|----------------------------------------------------------------------------------------------------------------------------------------------------------------------------------------------------------------|
| #1  | MeSH descriptor: [Diabetes Mellitus] explode all trees                                                                                                                                                         |
| #2  | (Diabetes Mellitus):ti,ab,kw OR (diabet*):ti,ab,kw OR (insulin depend*)                                                                                                                                        |
| #3  | non insulin depend* OR noninsulin depend*                                                                                                                                                                      |
| #4  | IDDM OR NIDDM OR MODY OR T1DM OR T2DM OR T1D OR T2D                                                                                                                                                            |
| #5  | #1 OR #2 OR #3 OR #4                                                                                                                                                                                           |
| #6  | MeSH descriptor: [Smartphone] explode all trees                                                                                                                                                                |
| #7  | MeSH descriptor: [Cell Phone] explode all trees                                                                                                                                                                |
| #8  | (smartphone*):ti,ab,kw OR (cell* phone*):ti,ab,kw OR (cell* telephone*):ti,ab,kw                                                                                                                               |
| #9  | (cell*):ti,ab,kw OR (mobile*):ti,ab,kw OR (handheld*):ti,ab,kw OR (hand held*):ti,ab,kw OR (smart):ti,ab,kw                                                                                                    |
| #10 | (phone*):ti,ab,kw OR (telephone*):ti,ab,kw OR (technolog*):ti,ab,kw OR (device*):ti,ab,kw                                                                                                                      |
| #11 | #9 AND #10                                                                                                                                                                                                     |
| #12 | (samsung) OR (nokia) OR (android)                                                                                                                                                                              |
| #13 | (ipad* OR i-pad* OR ipod* OR i-pod* OR iphone* OR i-phone*)                                                                                                                                                    |
| #14 | (Mobile technolog*) OR (Portable device*) OR (portable electronic device*) OR (Transportable Cellular Phone*)                                                                                                  |
| #15 | #6 OR #7 OR #8 OR #10 OR #12 OR #13 OR #14                                                                                                                                                                     |
| #16 | MeSH descriptor: [Ophthalmoscopes] explode all trees                                                                                                                                                           |
| #17 | MeSH descriptor: [Ophthalmoscopy] explode all trees                                                                                                                                                            |
| #18 | (fundus photograph*) OR (funduscop*) OR (fundus camera*) OR (Monocular indirect ophthalmoscop*) OR (indirect ophthalmoscop*) OR (indirect lens adapter*) OR (retinal imaging adapter*) OR (tele-ophthalmolog*) |
| #19 | ((retina*) OR (fundus)) AND ((photo*) OR (imag*) OR (camera*))                                                                                                                                                 |
| #20 | (diagnos*) AND ((computer-assist*) OR (ophthalmo*))                                                                                                                                                            |
| #21 | #16 OR #17 OR #18 OR #19 OR #20                                                                                                                                                                                |
| #22 | MeSH descriptor: [Diabetic Retinopathy] explode all trees                                                                                                                                                      |
| #23 | MeSH descriptor: [Vision, Low] explode all trees                                                                                                                                                               |
| #24 | MeSH descriptor: [Blindness] explode all trees                                                                                                                                                                 |

|     |                                                                                                                                                                                                                                                                                                                                                                                                                                                                                                                                                                                                                                                                                                                                                                                                                                                                                                                                                                                     |
|-----|-------------------------------------------------------------------------------------------------------------------------------------------------------------------------------------------------------------------------------------------------------------------------------------------------------------------------------------------------------------------------------------------------------------------------------------------------------------------------------------------------------------------------------------------------------------------------------------------------------------------------------------------------------------------------------------------------------------------------------------------------------------------------------------------------------------------------------------------------------------------------------------------------------------------------------------------------------------------------------------|
| #25 | MeSH descriptor: [Eye Hemorrhage] explode all trees                                                                                                                                                                                                                                                                                                                                                                                                                                                                                                                                                                                                                                                                                                                                                                                                                                                                                                                                 |
| #26 | MeSH descriptor: [Neovascularization, Pathologic] explode all trees                                                                                                                                                                                                                                                                                                                                                                                                                                                                                                                                                                                                                                                                                                                                                                                                                                                                                                                 |
| #27 | MeSH descriptor: [Macular Edema] explode all trees                                                                                                                                                                                                                                                                                                                                                                                                                                                                                                                                                                                                                                                                                                                                                                                                                                                                                                                                  |
| #28 | MeSH descriptor: [Vitreous Body] explode all trees                                                                                                                                                                                                                                                                                                                                                                                                                                                                                                                                                                                                                                                                                                                                                                                                                                                                                                                                  |
| #29 | Diabetic Retinopath* OR (diabet* AND retinopath*) OR ((vision* OR visual OR retina* OR eye) AND (disease* OR disorder*)) OR ((vision* OR visual*) AND (loss* OR subnormal OR low OR handicap OR impair* OR disab*)) OR maculopath* OR blindness OR retinopath* OR ((hard OR soft) AND exudate*) OR retina* microaneurysm* OR (cotton wool AND (spot* OR patch*)) OR (macula* AND (defect* OR degeneration* OR oedem* OR edem*)) OR DME OR DMO OR CME OR CSME OR intraretina* microvascular abnormalit* OR IRMA OR (venous AND (bead* OR loop*)) OR ((vitre* OR intraretina*) AND (hemorrhag* OR haemorrhag*)) OR (vitre* AND (body OR bodies)) OR (retin* AND (detachment* OR neovascularization* OR neovascularisation* OR proliferans OR pre-proliferat* OR preproliferat* OR proliferat*)) OR fibrous tissue OR retinitis OR maculopath* OR (rubeosis AND (iris* OR irid*)) OR VTDR OR STDR OR vision-threatening diabetic retinopath* OR sight-threatening diabetic retinopath* |
| #30 | #22 OR #23 OR #24 OR #25 OR #26 OR #27 OR #28 OR #29                                                                                                                                                                                                                                                                                                                                                                                                                                                                                                                                                                                                                                                                                                                                                                                                                                                                                                                                |
| #31 | #5 AND #15 AND #21 AND #30                                                                                                                                                                                                                                                                                                                                                                                                                                                                                                                                                                                                                                                                                                                                                                                                                                                                                                                                                          |

**Supplementary Table 4.** Search strategy for Scopus in August 2<sup>nd</sup> 2022.

| Query                                                                                                                                                                                                                                                                                                                                                                                                         |
|---------------------------------------------------------------------------------------------------------------------------------------------------------------------------------------------------------------------------------------------------------------------------------------------------------------------------------------------------------------------------------------------------------------|
| ( TITLE-ABS-KEY-AUTH ( diabetes AND mellitus ) ) AND ( ( ( TITLE-ABS-KEY ( smartphone ) OR TITLE-ABS-KEY ( cell AND phone* ) ) ) OR ( ( TITLE-ABS-KEY ( fundus AND photograph* ) OR TITLE-ABS-KEY ( fundus AND camera* ) ) ) ) ) AND ( ( TITLE-ABS-KEY ( diabet* AND retinopath* ) OR TITLE-ABS-KEY ( retinopath* ) ) ) AND ( LIMIT-TO ( EXACTKEYWORD , "Human" ) ) AND ( LIMIT-TO ( LANGUAGE , "English" ) ) |
